# Supplementary material for: Tele-Active Rehabilitation for Youth With Concussion: Evidence-Based and Theory-Informed Intervention Development
Source: PubMed Central journal article supplement (PMC9016504; doi:10.2196/34822), 2022-04-04
Supplement: pediatrics_v5i2e34822_app1.pdf [file pediatrics_v5i2e34822_app1.pdf]

Supplementary Table 1. Intervention characteristics among studies included in review

| First author, year [reference] | Study design                                            | Participants (sample size)                                                                          | Intervention details: Duration, components, training frequency, supervision                                                                                                                                                                                                                                                                                                                                                                                                                                                                                     | Key outcome measures                                                                                                                                                                                              |
|--------------------------------|---------------------------------------------------------|-----------------------------------------------------------------------------------------------------|-----------------------------------------------------------------------------------------------------------------------------------------------------------------------------------------------------------------------------------------------------------------------------------------------------------------------------------------------------------------------------------------------------------------------------------------------------------------------------------------------------------------------------------------------------------------|-------------------------------------------------------------------------------------------------------------------------------------------------------------------------------------------------------------------|
| Sang, 2019 [7]                 | Prospective quasi-experimental repeated measures design | Youth ages 9-18 years with post-concussion symptoms at least 2 weeks post-injury (n=52)             | <ul style="list-style-type: none"> <li>• <u>Duration</u>: 6 weeks.</li> <li>• <u>Components</u>: Comprehensive education, graded low-intensity aerobic exercise (walking or stationary bike) at 50-60% HR<sub>max</sub> or level 4/10 on Pictorial Children's Effort Rating Table (15 minutes), sport-specific coordination drills (10 minutes), and relaxation exercises (5-10 minutes).</li> <li>• <u>Training frequency</u>: 7 days/week.</li> <li>• <u>Supervision</u>: In-person assessment at 0, 3, and 6. Phone check-ins at week 1, 2 and 4.</li> </ul> | <ul style="list-style-type: none"> <li>• Post-concussion symptoms (Post-Concussion Symptom Inventory)</li> <li>• Occupational performance and satisfaction (Canadian Occupational Performance Measure)</li> </ul> |
| Kurowski, 2017 [16]            | Randomized clinical trial                               | Adolescents ages 12-17 years with persistent post-concussion symptoms 4-16 weeks post-injury (n=30) | <ul style="list-style-type: none"> <li>• <u>Duration</u>: 6 weeks.</li> <li>• <u>Components</u>: Progressive aerobic exercise (stationary cycling) at Borg RPE intensity level 11-16.</li> <li>• <u>Training frequency</u>: 5-6 days/week.</li> <li>• <u>Supervision</u>: Weekly in-person assessment.</li> </ul>                                                                                                                                                                                                                                               | <ul style="list-style-type: none"> <li>• Post-concussion symptoms (Post-Concussion Symptom Inventory)</li> </ul>                                                                                                  |
| Chrisman, 2019 [17]            | Pilot randomized control trial                          | Adolescents ages 12-17 years with persistent post-concussion symptoms (n=30)                        | <ul style="list-style-type: none"> <li>• <u>Duration</u>: 6 weeks.</li> <li>• <u>Components</u>: Progressive aerobic exercise training based on results from Buffalo Concussion Treadmill Test.</li> <li>• <u>Training frequency</u>: 7 days/week.</li> <li>• <u>Supervision</u>: In-person assessment at weeks 0 and 6. Weekly telephone calls weeks 1-5.</li> </ul>                                                                                                                                                                                           | <ul style="list-style-type: none"> <li>• Post-concussion symptoms (Health Behaviour Inventory)</li> </ul>                                                                                                         |
| Chrisman, 2017 [18]            | Retrospective cohort study                              | Youth ages 12-18 with persistent post-concussion symptoms >1 month post-injury (n=83)               | <ul style="list-style-type: none"> <li>• <u>Duration</u>: Until symptom resolution.</li> <li>• <u>Components</u>: Progressive aerobic exercise training based on results from Buffalo Concussion Treadmill Test.</li> <li>• <u>Training frequency</u>: 7 days/week.</li> <li>• <u>Supervision</u>: In-person assessment every 1-2 weeks.</li> </ul>                                                                                                                                                                                                             | <ul style="list-style-type: none"> <li>• Post-concussion symptoms (SCAT-2)</li> </ul>                                                                                                                             |
| Leddy, 2019 [19]               | Multicentre randomized clinical trial                   | Adolescent athletes ages 13-18 years presenting within 10                                           | <ul style="list-style-type: none"> <li>• <u>Duration</u>: Until symptom resolution.</li> <li>• <u>Components</u>: Progressive aerobic exercise training based on results from Buffalo Concussion Treadmill Test.</li> </ul>                                                                                                                                                                                                                                                                                                                                     | <ul style="list-style-type: none"> <li>• Post-concussion symptoms (Post-Concussion Symptom Scale)</li> </ul>                                                                                                      |

|                   |                           |                                                                                                     |                                                                                                                                                                                                                                                                                                                                                                                                                                                                                                     |                                                                                                                  |
|-------------------|---------------------------|-----------------------------------------------------------------------------------------------------|-----------------------------------------------------------------------------------------------------------------------------------------------------------------------------------------------------------------------------------------------------------------------------------------------------------------------------------------------------------------------------------------------------------------------------------------------------------------------------------------------------|------------------------------------------------------------------------------------------------------------------|
|                   |                           | days of sport-related concussion (n=103).                                                           | <ul style="list-style-type: none"> <li>• <u>Training frequency</u>: 7 days/week.</li> <li>• <u>Supervision</u>: Weekly in-person assessment</li> </ul>                                                                                                                                                                                                                                                                                                                                              |                                                                                                                  |
| Leddy, 2019 [20]  | Quasi-experimental Trial  | Adolescent athletes ages 13-18 years presenting within 1-9 days of sport-related concussion (n=54). | <ul style="list-style-type: none"> <li>• <u>Duration</u>: Until symptom resolution.</li> <li>• <u>Components</u>: Progressive aerobic exercise training based on results from Buffalo Concussion Treadmill Test.</li> <li>• <u>Training frequency</u>: 7 days/week.</li> <li>• <u>Supervision</u>: Weekly in-person assessment</li> </ul>                                                                                                                                                           | <ul style="list-style-type: none"> <li>• Post-concussion symptoms (Post-Concussion Symptom Scale)</li> </ul>     |
| Leddy, 2010 [21]  | Prospective case series   | Youth and adult athletes 16-53 years old experiencing persistent post-concussion symptoms (n=12)    | <ul style="list-style-type: none"> <li>• <u>Duration</u>: Until symptom resolution.</li> <li>• <u>Components</u>: Progressive aerobic exercise training based on results from Buffalo Concussion Treadmill Test.</li> <li>• <u>Training frequency</u>: 5-6 days/week.</li> <li>• <u>Supervision</u>: In-person assessment every 3 weeks.</li> </ul>                                                                                                                                                 | <ul style="list-style-type: none"> <li>• Post-concussion symptoms (Graded Symptom Checklist)</li> </ul>          |
| Willer, 2019 [24] | Quasi-experimental Trial  | Adolescent athletes aged 13-18 years presenting within 10 days of sport-related concussion (n=103)  | <ul style="list-style-type: none"> <li>• <u>Duration</u>: Until symptom resolution.</li> <li>• <u>Components</u>: Progressive aerobic exercise training based on results from Buffalo Concussion Treadmill Test.</li> <li>• <u>Training frequency</u>: 7 days/week.</li> <li>• <u>Supervision</u>: Weekly in-person assessment</li> </ul>                                                                                                                                                           | <ul style="list-style-type: none"> <li>• Post-concussion symptoms (Post-Concussion Symptom Scale)</li> </ul>     |
| Chan, 2018 [25]   | Randomized clinical trial | Youth ages 12-18 with persistent post-concussion symptoms >1 month post-injury (n=19)               | <ul style="list-style-type: none"> <li>• <u>Duration</u>: 6 weeks.</li> <li>• <u>Components</u>: Comprehensive education, graded low-intensity aerobic exercise at 50-60% HR<sub>max</sub> or level 4/10 on Pictorial Children's Effort Rating Table (15 minutes), sport-specific coordination drills (10 minutes), and relaxation/visualization exercises (5 minutes).</li> <li>• <u>Training frequency</u>: 7 days/week.</li> <li>• <u>Supervision</u>: Weekly in-person reassessment.</li> </ul> | <ul style="list-style-type: none"> <li>• Post-concussion symptoms (Post-Concussion Symptom Scale)</li> </ul>     |
| Dobney, 2019 [26] | Randomized clinical trial | Youth ages 9-17 years old with post-concussion symptoms at least 2 weeks post-injury (n=20)         | <ul style="list-style-type: none"> <li>• <u>Duration</u>: 6 weeks.</li> <li>• <u>Components</u>: Comprehensive education, graded low-intensity aerobic exercise at 50-60% HR<sub>max</sub> or level 4/10 on Pictorial Children's Effort Rating Table (15 minutes), sport-specific coordination drills (10 minutes), and relaxation/visualization exercises (5-10 minutes).</li> </ul>                                                                                                               | <ul style="list-style-type: none"> <li>• Post-concussion symptoms (Post-Concussion Symptom Inventory)</li> </ul> |

|                          |                                                                 |                                                                                                    |                                                                                                                                                                                                                                                                                                                                                                                                                                                                                                                                                        |                                                                                                                                                                                                                                                      |
|--------------------------|-----------------------------------------------------------------|----------------------------------------------------------------------------------------------------|--------------------------------------------------------------------------------------------------------------------------------------------------------------------------------------------------------------------------------------------------------------------------------------------------------------------------------------------------------------------------------------------------------------------------------------------------------------------------------------------------------------------------------------------------------|------------------------------------------------------------------------------------------------------------------------------------------------------------------------------------------------------------------------------------------------------|
|                          |                                                                 |                                                                                                    | <ul style="list-style-type: none"> <li>• <u>Training frequency</u>: 7 days/week.</li> <li>• <u>Supervision</u>: Weekly in-person reassessment.</li> </ul>                                                                                                                                                                                                                                                                                                                                                                                              |                                                                                                                                                                                                                                                      |
| Dobney, 2017 [27]        | Retrospective analysis of prospectively collected clinical data | Youth ages 11-17 years old with post-concussion symptoms at least 3-4 weeks post-injury (n=277)    | <ul style="list-style-type: none"> <li>• <u>Duration</u>: 6 weeks.</li> <li>• <u>Components</u>: Comprehensive education, graded low-intensity aerobic exercise at 50-60% HR<sub>max</sub> or level 4/10 on Pictorial Children's Effort Rating Table (15 minutes), sport-specific coordination drills (10 minutes), and relaxation/visualization exercises (5-10 minutes).</li> <li>• <u>Training frequency</u>: 7 days/week.</li> <li>• <u>Supervision</u>: Weekly in-person reassessment.</li> </ul>                                                 | <ul style="list-style-type: none"> <li>• Post-concussion symptoms (Post-Concussion Symptom Scale)</li> </ul>                                                                                                                                         |
| Gagnon, 2009 [28]        | Case series                                                     | Youth ages 10-17 years old with post-concussion symptoms at least 4 weeks post-injury (n=16)       | <ul style="list-style-type: none"> <li>• <u>Duration</u>: Until clinical recovery (mean 4.4 weeks, SD = 2.6 weeks)</li> <li>• <u>Components</u>: Comprehensive education, graded low-intensity aerobic exercise at 50-60% HR<sub>max</sub> or level 4/10 on Pictorial Children's Effort Rating Table (15 minutes), sport-specific coordination drills (10 minutes), and relaxation/visualization exercises (5-10 minutes).</li> <li>• <u>Training frequency</u>: 7 days/week.</li> <li>• <u>Supervision</u>: Weekly in-person reassessment.</li> </ul> | <ul style="list-style-type: none"> <li>• Post-concussion symptoms (Post-Concussion Scale-Revised)</li> </ul>                                                                                                                                         |
| Gagnon, 2016 [29]        | Case series                                                     | Adolescents ages 14-18 years old with post-concussion symptoms at least 4 weeks post-injury (n=10) | <ul style="list-style-type: none"> <li>• <u>Duration</u>: 6 weeks.</li> <li>• <u>Components</u>: Comprehensive education, graded low-intensity aerobic exercise at 50-60% HR<sub>max</sub> or level 4/10 on Pictorial Children's Effort Rating Table (15 minutes), sport-specific coordination drills (10 minutes), and relaxation/visualization exercises (5-10 minutes).</li> <li>• <u>Training frequency</u>: 7 days/week.</li> <li>• <u>Supervision</u>: Weekly in-person reassessment.</li> </ul>                                                 | <ul style="list-style-type: none"> <li>• Post-concussion symptoms (Post-Concussion Scale)</li> <li>• Mood (Beck Depression Inventory – Second Edition)</li> <li>• Energy level (Pediatric Quality of Life Multidimensional Fatigue Scale)</li> </ul> |
| Gauvin-Lepage, 2018 [30] | Multicenter prospective quasi-experimental study                | Youth ages 8-17 years old with post-concussion symptoms at least 4 weeks post-injury (n=49)        | <ul style="list-style-type: none"> <li>• <u>Duration</u>: 6 weeks.</li> <li>• <u>Components</u>: Comprehensive education, graded low-intensity aerobic exercise at 50-60% HR<sub>max</sub> or level 4/10 on Pictorial Children's Effort Rating Table (15 minutes), sport-specific coordination drills (10</li> </ul>                                                                                                                                                                                                                                   | <ul style="list-style-type: none"> <li>• Post-concussion symptoms (Post-Concussion Symptom Inventory)</li> <li>• Mood and anxiety (Beck Youth Inventory, Child Behaviour Checklist)</li> </ul>                                                       |

|                   |                                                                               |                                                                                              |                                                                                                                                                                                                                                                                                                                                                                                                                                                                                                                                                                 |                                                                                                                                                                                                                |
|-------------------|-------------------------------------------------------------------------------|----------------------------------------------------------------------------------------------|-----------------------------------------------------------------------------------------------------------------------------------------------------------------------------------------------------------------------------------------------------------------------------------------------------------------------------------------------------------------------------------------------------------------------------------------------------------------------------------------------------------------------------------------------------------------|----------------------------------------------------------------------------------------------------------------------------------------------------------------------------------------------------------------|
|                   |                                                                               |                                                                                              | <p>minutes), and relaxation/visualization exercises (5-10 minutes).</p> <ul style="list-style-type: none"> <li>• <u>Training frequency</u>: 7 days/week.</li> <li>• <u>Supervision</u>: Weekly in-person reassessment.</li> </ul>                                                                                                                                                                                                                                                                                                                               | <ul style="list-style-type: none"> <li>• Energy level (Pediatric Quality of Life Multidimensional Fatigue Scale)</li> <li>• Quality of life (Pediatric Quality of Life – Generic Module)</li> </ul>            |
| Imhoff, 2016 [32] | Case Series                                                                   | Youth ages 10-17 years old with post-concussion symptoms at least 4 weeks post-injury (n=15) | <ul style="list-style-type: none"> <li>• <u>Duration</u>: Until clinical recovery (mean duration: <math>49 \pm 17</math> days).</li> <li>• <u>Components</u>: Progressive low- to high-intensity aerobic exercise (20 minutes) at Borg RPE levels 2-5/10, sport-specific coordination exercises (10 minutes), and therapeutic balance exercises.</li> <li>• <u>Training frequency</u>: 3 days/week.</li> <li>• <u>Supervision</u>: Initial in-person assessment and weekly phone check-in.</li> </ul>                                                           | <ul style="list-style-type: none"> <li>• Post-concussion symptoms (Post-Concussion Symptom Inventory)</li> </ul>                                                                                               |
| Hunt, 2020 [80]   | Secondary analysis of prospective quasi-experimental repeated measures design | Youth ages 9-18 years with post-concussion symptoms at least 2 weeks post-injury (n=40)      | <ul style="list-style-type: none"> <li>• <u>Duration</u>: 6 weeks.</li> <li>• <u>Components</u>: Comprehensive education, graded low-intensity aerobic exercise (walking or stationary bike) at 50-60% HR<sub>max</sub> or level 4/10 on Pictorial Children's Effort Rating Table (15 minutes), sport-specific coordination drills (10 minutes), and relaxation exercises (5-10 minutes).</li> <li>• <u>Training frequency</u>: 7 days/week.</li> <li>• <u>Supervision</u>: In-person assessment at 0, 3, and 6. Phone check-ins at week 1, 2 and 4.</li> </ul> | <ul style="list-style-type: none"> <li>• Emotional and social well-being (Beck Youth Inventories, Second Edition)</li> <li>• Parental reported psychological well-being (Child Behaviour Checklist)</li> </ul> |
